# Supplementary material
Source: MDPI journal article supplement (https://www.mdpi.com/2073-4395/14/4/689)
Supplement: s1 [file s1]

Archive with 2 entries (2 files):
- agronomy-2800536-supplementary.pdf
- agronomy-2800536-supplementary.docx
