# Supplementary material
Source: MDPI journal article supplement (https://www.mdpi.com/2073-4395/14/4/689)
Supplement: s1 [file s1 › agronomy-2800536-supplementary.docx]

**Combining *Robinia pseudoacacia* leaves and corn straw increased soil carbon storage and corn yield in Loess Plateau**

Han-Yu Liua,b,Jian-Jian Liua,b, Zhen-Jiao Zhanga,b,Wei-Chao Liua,b, Qi Zhanga,b, Xing Wanga,b, Cheng-Jie Rena,b,, Gai-He Yanga,b , Xin-Hui Hana,b,*

*Corresponding Author: Xin-Hui Han, Email: hanxinhui@nwsuaf.edu.cn.(X. H. Han)

This file includes the following:

Fig. S1. Sample site location and experimental design.

Fig. S2. Changes in soil organic carbon(SOC) of each treatment at different growth stages of corn

Fig. S3. Changes in soil readily oxidized organic carbon(ROOC) of each treatment at different growth stages of corn

Fig. S4. Changes in soil microbial biomass carbon(MBC) of each treatment at different growth stages of corn

Fig. S5. Changes in soil recalcitrant organic carbon(ROC) of each treatment at different growth stages of corn

Fig. S6. Daily rainfall and temperature during the experimental period

Table S1. Basic physical-chemical properties of soil in the experimental field

Table S2. Corn grain yield


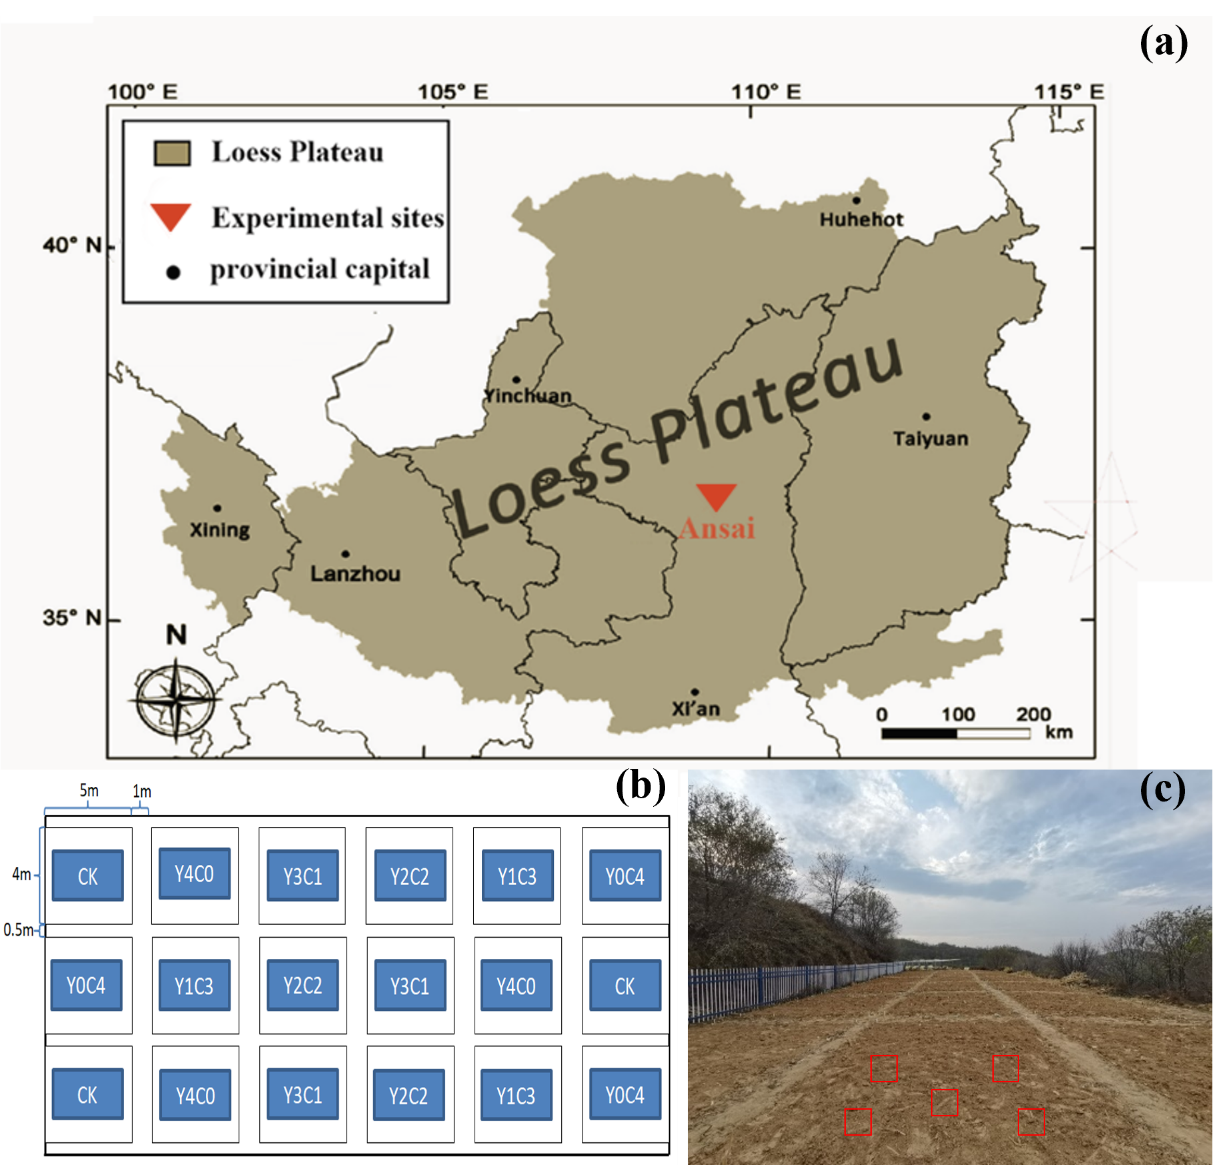


Fig. S1. Sample site location and experimental design. (a)Site locations on the Loess Plateau are shown by red triangle with site names. (b) Schematic drawing of the distribution of the sample plot. (c)Soil sampling at each treatment with five replicates.





Fig. S2. Changes in soil organic carbon(SOC) of each treatment at different growth stages of corn

Note: Data that do not share a letter significantly differ between treatments (P < 0.05); SS: seedling stage, JS: jointing stage, HS: heading stage, GFS: grain filling stage, RS: ripening stage; Y4C0: corn straw only, Y3C1: combined application of three-quarters corn straw and one-quarter Robinia pseudoacacia leaves, Y2C2: half corn straw and half Robinia pseudoacacia leaves, Y1C3: combined application of three-quarters Robinia pseudoacacia leaves and one-quarter corn straw, Y0C4: Robinia pseudoacacia leaves only, CK: without returning materials. the same below.





Fig. S3. Changes in soil readily oxidized organic carbon(ROOC) of each treatment at different growth stages of corn





Fig. S4. Changes in soil microbial biomass carbon(MBC) of each treatment at different growth stages of corn





Fig. S5. Changes in soil recalcitrant organic carbon(ROC) of each treatment at different growth stages of corn





Fig. S6. Daily rainfall and temperature during the experimental period

Table S1. Basic physical-chemical properties of soil in the experimental field

| Item | SWC  (%) | BD  (g·cm-3) | pH | SOC  (g·kg-1) | TN  (g·kg-1) | TP  (g·kg-1) |
| --- | --- | --- | --- | --- | --- | --- |
| 0-20cm | 9.70±0.40 | 1.15±0.02 | 8.56±0.06 | 4.41±0.27 | 0.41±0.02 | 0.58±0.00 |

Note: The data are mean ± standard error. SWC: soil water content; BD: soil bulk density; SOC: soil organic carbon; TN: total soil nitrogen; TP: total soil phosphorus.

Table S2. Corn grain yield

| Treatment | Yield  (kg·hm-2) | Compared to CK  (%) |
| --- | --- | --- |
| CK | 7633.76±50.49e | — |
| Y4C0 | 8695.22±53.44d | 13.90 |
| Y3C1 | 9201.30±58.56c | 20.53 |
| Y2C2 | 9825.31±63.89b | 28.71 |
| Y1C3 | 10079.45±62.66a | 32.04 |
| Y0C4 | 9348.41±137.75c | 22.46 |
